# Supplementary material for: Obesity as a Risk Factor for Prostate Cancer Mortality: A Systematic Review and Dose-Response Meta-Analysis of 280,199 Patients
Source: MDPI journal article supplement (doi:10.3390/cancers13164169), 2021-08-19
Supplement: s1 [file s1]

Methodological quality assessment of the selected studies according to Newcastle-Ottawa Scale.

**A. Cohort studies (n=58)**

| Study      | Year | <u><b>Selection</b></u>              |                                        |                                        |                                  | <u><b>Comparability</b></u>   |                                | <u><b>Outcome</b></u> |                                                      |                                    | <b>Total score</b> |
|------------|------|--------------------------------------|----------------------------------------|----------------------------------------|----------------------------------|-------------------------------|--------------------------------|-----------------------|------------------------------------------------------|------------------------------------|--------------------|
|            |      | Representativeness of exposed cohort | Representativeness of unexposed cohort | Ascertainment of exposure <sup>1</sup> | Outcome was not present at start | Important Factor <sup>2</sup> | Additional factor <sup>3</sup> | Assessment            | Exposure follow-up long enough for outcomes to occur | Adequacy of follow-up <sup>4</sup> |                    |
| Bluethmann | 2020 | 0                                    | 1                                      | 0                                      | 1                                | 1                             | 1                              | 1                     | 1                                                    | 0                                  | <b>6</b>           |
| Crump      | 2020 | 1                                    | 1                                      | 1                                      | 1                                | 1                             | 1                              | 1                     | 1                                                    | 1                                  | <b>9</b>           |
| Jackson    | 2020 | 0                                    | 1                                      | 0                                      | 1                                | 1                             | 1                              | 1                     | 1                                                    | 0                                  | <b>6</b>           |
| Jochems    | 2020 | 1                                    | 1                                      | 1                                      | 1                                | 1                             | 1                              | 1                     | 1                                                    | 0                                  | <b>8</b>           |
| Vidal      | 2020 | 0                                    | 1                                      | 1                                      | 1                                | 1                             | 1                              | 1                     | 1                                                    | 0                                  | <b>7</b>           |
| Troeschel  | 2020 | 0                                    | 1                                      | 0                                      | 1                                | 1                             | 1                              | 1                     | 1                                                    | 0                                  | <b>6</b>           |
| Dickerman  | 2019 | 1                                    | 1                                      | 1                                      | 1                                | 1                             | 1                              | 1                     | 1                                                    | 0                                  | <b>8</b>           |
| Langlais   | 2019 | 0                                    | 1                                      | 0                                      | 1                                | 1                             | 1                              | 1                     | 1                                                    | 0                                  | <b>7</b>           |
| Darcey     | 2019 | 1                                    | 1                                      | 0                                      | 1                                | 1                             | 1                              | 1                     | 1                                                    | 0                                  | <b>7</b>           |
| Wade       | 2019 | 1                                    | 1                                      | 1                                      | 1                                | 1                             | 1                              | 1                     | 1                                                    | 0                                  | <b>8</b>           |
| Farris     | 2018 | 1                                    | 1                                      | 1                                      | 1                                | 1                             | 1                              | 1                     | 0                                                    | 0                                  | <b>7</b>           |
| Hu         | 2018 | 0                                    | 1                                      | 1                                      | 1                                | 1                             | 1                              | 1                     | 0                                                    | 0                                  | <b>6</b>           |

| Pérez-Cornago | 2017 | 1                                    | 1                                      | 1                                      | 1                                | 1                             | 1                              | 1              | 1                                                    | 1                                  | 9           |
|---------------|------|--------------------------------------|----------------------------------------|----------------------------------------|----------------------------------|-------------------------------|--------------------------------|----------------|------------------------------------------------------|------------------------------------|-------------|
| Study         | Year | <u>Selection</u>                     |                                        |                                        |                                  | <u>Comparability</u>          |                                | <u>Outcome</u> |                                                      |                                    | Total score |
|               |      | Representativeness of exposed cohort | Representativeness of unexposed cohort | Ascertainment of exposure <sup>1</sup> | Outcome was not present at start | Important Factor <sup>2</sup> | Additional factor <sup>3</sup> | Assessment     | Exposure follow-up long enough for outcomes to occur | Adequacy of follow-up <sup>4</sup> |             |
| Dickerman     | 2017 | 0                                    | 1                                      | 0                                      | 1                                | 1                             | 1                              | 1              | 1                                                    | 1                                  | 7           |
| Kelly         | 2017 | 1                                    | 1                                      | 0                                      | 1                                | 1                             | 1                              | 1              | 1                                                    | 1                                  | 8           |
| Polesel       | 2016 | 1                                    | 1                                      | 0                                      | 1                                | 1                             | 1                              | 1              | 1                                                    | 0                                  | 7           |
| Cushen        | 2016 | 0                                    | 1                                      | 0                                      | 1                                | 1                             | 1                              | 1              | 0                                                    | 0                                  | 5           |
| Fowke         | 2015 | 1                                    | 1                                      | 0                                      | 1                                | 1                             | 1                              | 1              | 1                                                    | 0                                  | 7           |
| Wang          | 2015 | 0                                    | 1                                      | 1                                      | 1                                | 1                             | 1                              | 1              | 1                                                    | 1                                  | 8           |
| Cantarutti    | 2015 | 1                                    | 1                                      | 0                                      | 1                                | 1                             | 1                              | 1              | 1                                                    | 0                                  | 7           |
| Taghizadeh    | 2015 | 1                                    | 1                                      | 0                                      | 1                                | 1                             | 1                              | 0              | 1                                                    | 1                                  | 7           |
| Mohammed      | 2015 | 0                                    | 1                                      | 1                                      | 1                                | 1                             | 1                              | 1              | 0                                                    | 1                                  | 7           |
| Moller        | 2015 | 1                                    | 1                                      | 1                                      | 1                                | 0                             | 1                              | 1              | 1                                                    | 0                                  | 7           |
| Bonn          | 2014 | 0                                    | 1                                      | 0                                      | 1                                | 1                             | 1                              | 1              | 1                                                    | 0                                  | 6           |
| Chalfin       | 2014 | 0                                    | 1                                      | 0                                      | 1                                | 1                             | 1                              | 1              | 1                                                    | 0                                  | 6           |
| Froehner      | 2014 | 0                                    | 1                                      | 1                                      | 1                                | 1                             | 1                              | 1              | 1                                                    | 1                                  | 8           |
| Gravis        | 2014 | 0                                    | 1                                      | 1                                      | 1                                | 0                             | 0                              | 0              | 1                                                    | 0                                  | 4           |
| Tendulkar     | 2013 | 0                                    | 1                                      | 0                                      | 1                                | 0                             | 0                              | 0              | 1                                                    | 0                                  | 3           |

| Bassett      | 2012 | 1                                    | 1                                      | 1                                      | 1                                | 0                             | 1                              | 1              | 1                                                    | 1                                  | 8           |
|--------------|------|--------------------------------------|----------------------------------------|----------------------------------------|----------------------------------|-------------------------------|--------------------------------|----------------|------------------------------------------------------|------------------------------------|-------------|
| Study        | Year | <u>Selection</u>                     |                                        |                                        |                                  | <u>Comparability</u>          |                                | <u>Outcome</u> |                                                      |                                    | Total score |
|              |      | Representativeness of exposed cohort | Representativeness of unexposed cohort | Ascertainment of exposure <sup>1</sup> | Outcome was not present at start | Important Factor <sup>2</sup> | Additional factor <sup>3</sup> | Assessment     | Exposure follow-up long enough for outcomes to occur | Adequacy of follow-up <sup>4</sup> |             |
| Schwartz     | 2012 | 1                                    | 1                                      | 1                                      | 1                                | 1                             | 1                              | 1              | 1                                                    | 0                                  | 8           |
| Park         | 2012 | 0                                    | 1                                      | 1                                      | 1                                | 1                             | 1                              | 0              | 1                                                    | 1                                  | 7           |
| Haggstrom    | 2012 | 1                                    | 1                                      | 1                                      | 1                                | 1                             | 1                              | 1              | 1                                                    | 0                                  | 8           |
| Disciaciatti | 2011 | 1                                    | 1                                      | 0                                      | 1                                | 1                             | 1                              | 1              | 1                                                    | 0                                  | 7           |
| Dehal        | 2011 | 1                                    | 1                                      | 1                                      | 1                                | 1                             | 1                              | 1              | 1                                                    | 1                                  | 9           |
| Geinitz      | 2011 | 0                                    | 1                                      | 1                                      | 1                                | 1                             | 1                              | 1              | 1                                                    | 0                                  | 7           |
| Van Roermund | 2010 | 0                                    | 1                                      | 1                                      | 1                                | 1                             | 1                              | 1              | 0                                                    | 1                                  | 7           |
| Han          | 2010 | 0                                    | 1                                      | 1                                      | 1                                | 1                             | 1                              | 1              | 1                                                    | 0                                  | 7           |
| Burton       | 2010 | 1                                    | 1                                      | 1                                      | 1                                | 0                             | 1                              | 1              | 1                                                    | 0                                  | 7           |
| Martin       | 2009 | 1                                    | 1                                      | 1                                      | 1                                | 1                             | 1                              | 1              | 1                                                    | 0                                  | 8           |
| Pfitzenmaier | 2009 | 0                                    | 1                                      | 0                                      | 1                                | 0                             | 1                              | 0              | 1                                                    | 0                                  | 4           |
| Davies       | 2009 | 0                                    | 1                                      | 1                                      | 1                                | 1                             | 1                              | 1              | 0                                                    | 0                                  | 6           |
| Armstrong    | 2009 | 0                                    | 1                                      | 1                                      | 1                                | 0                             | 1                              | 1              | 0                                                    | 0                                  | 5           |
| Ma           | 2008 | 1                                    | 1                                      | 0                                      | 1                                | 0                             | 1                              | 1              | 1                                                    | 1                                  | 7           |
| Merrick      | 2007 | 0                                    | 1                                      | 1                                      | 1                                | 0                             | 0                              | 1              | 1                                                    | 0                                  | 5           |

| Efstathiou         | 2007 | 0                                    | 1                                      | 1                                      | 1                                | 1                             | 1                              | 0              | 1                                                    | 0                                  | 6           |
|--------------------|------|--------------------------------------|----------------------------------------|----------------------------------------|----------------------------------|-------------------------------|--------------------------------|----------------|------------------------------------------------------|------------------------------------|-------------|
|                    |      | <u>Selection</u>                     |                                        |                                        |                                  | <u>Comparability</u>          |                                | <u>Outcome</u> |                                                      |                                    | Total score |
|                    |      | Representativeness of exposed cohort | Representativeness of unexposed cohort | Ascertainment of exposure <sup>1</sup> | Outcome was not present at start | Important Factor <sup>2</sup> | Additional factor <sup>3</sup> | Assessment     | Exposure follow-up long enough for outcomes to occur | Adequacy of follow-up <sup>4</sup> |             |
| Gong               | 2007 | 1                                    | 1                                      | 0                                      | 1                                | 1                             | 1                              | 1              | 1                                                    | 1                                  | 8           |
| Montgomery (8894)  | 2007 | 0                                    | 1                                      | 1                                      | 1                                | 0                             | 1                              | 0              | 0                                                    | 1                                  | 5           |
| Montgomery (9916)  | 2007 | 0                                    | 1                                      | 1                                      | 1                                | 0                             | 1                              | 0              | 0                                                    | 1                                  | 5           |
| Wright             | 2007 | 1                                    | 1                                      | 0                                      | 1                                | 1                             | 1                              | 1              | 0                                                    | 0                                  | 6           |
| Huxley             | 2007 | 1                                    | 1                                      | 1                                      | 1                                | 0                             | 1                              | 0              | 1                                                    | 0                                  | 6           |
| Halabi             | 2007 | 0                                    | 1                                      | 0                                      | 1                                | 1                             | 1                              | 0              | 1                                                    | 1                                  | 6           |
| Siddiqui           | 2006 | 0                                    | 1                                      | 1                                      | 1                                | 0                             | 1                              | 0              | 1                                                    | 1                                  | 6           |
| Park               | 2006 | 1                                    | 1                                      | 1                                      | 1                                | 1                             | 1                              | 1              | 0                                                    | 0                                  | 7           |
| Eichholzer         | 2005 | 0                                    | 1                                      | 1                                      | 1                                | 1                             | 1                              | 0              | 1                                                    | 0                                  | 6           |
| Rodriguez (CPS-I)  | 2001 | 1                                    | 1                                      | 0                                      | 1                                | 1                             | 1                              | 0              | 1                                                    | 1                                  | 6           |
| Rodriguez (CPS-II) | 2001 | 1                                    | 1                                      | 0                                      | 1                                | 1                             | 1                              | 0              | 1                                                    | 1                                  | 6           |
| Gapstur            | 2001 | 0                                    | 1                                      | 1                                      | 1                                | 1                             | 1                              | 1              | 1                                                    | 0                                  | 7           |
| Andersson          | 1997 | 0                                    | 1                                      | 1                                      | 1                                | 1                             | 0                              | 1              | 1                                                    | 1                                  | 7           |

<sup>1</sup> The point was assigned for objectively measured body mass index.

<sup>2</sup> If adjusted for age, the point was assigned.

<sup>3</sup> If adjusted for any other additional factor, the point was assigned.

<sup>4</sup> If the completeness of follow-up was 90% or more, or characteristics of lost cohort were similar to the rest of the cohort, the point was assigned.

## B. Case-control studies (n = 1)

| Study | Year | <u>Selection</u>    |                             |                       |                        | <u>Comparability</u>          |                                | <u>Exposure</u>            |                          |                   | Total score |
|-------|------|---------------------|-----------------------------|-----------------------|------------------------|-------------------------------|--------------------------------|----------------------------|--------------------------|-------------------|-------------|
|       |      | Definition of cases | Representativeness of cases | Selection of controls | Definition of controls | Important Factor <sup>1</sup> | Additional factor <sup>2</sup> | Ascertainment <sup>3</sup> | Same method for subjects | Non-response rate |             |
| Haque | 2014 | 1                   | 1                           | 1                     | 1                      | 1                             | 1                              | 0                          | 1                        | 1                 | <b>8</b>    |

<sup>1</sup> If adjusted for age, the point was assigned.

<sup>2</sup> If adjusted for any other additional factor, the point was assigned.

<sup>3</sup> The point was assigned for objectively measured body mass index.
