# Supplementary material for: Obesity as a Risk Factor for Prostate Cancer Mortality: A Systematic Review and Dose-Response Meta-Analysis of 280,199 Patients
Source: MDPI journal article supplement (doi:10.3390/cancers13164169), 2021-08-19
Supplement: s1 [file s1]

Forest-plot of the associations between obesity (BMI  $\geq 30$ ), overweight (BMI  $< 30$  and  $\geq 25$ ) and abnormal weight (BMI  $\geq 25$ ), compared to normal weight (BMI  $< 25$ ), and continuous BMI per 5 units, on prostate cancer specific mortality and all-cause mortality.

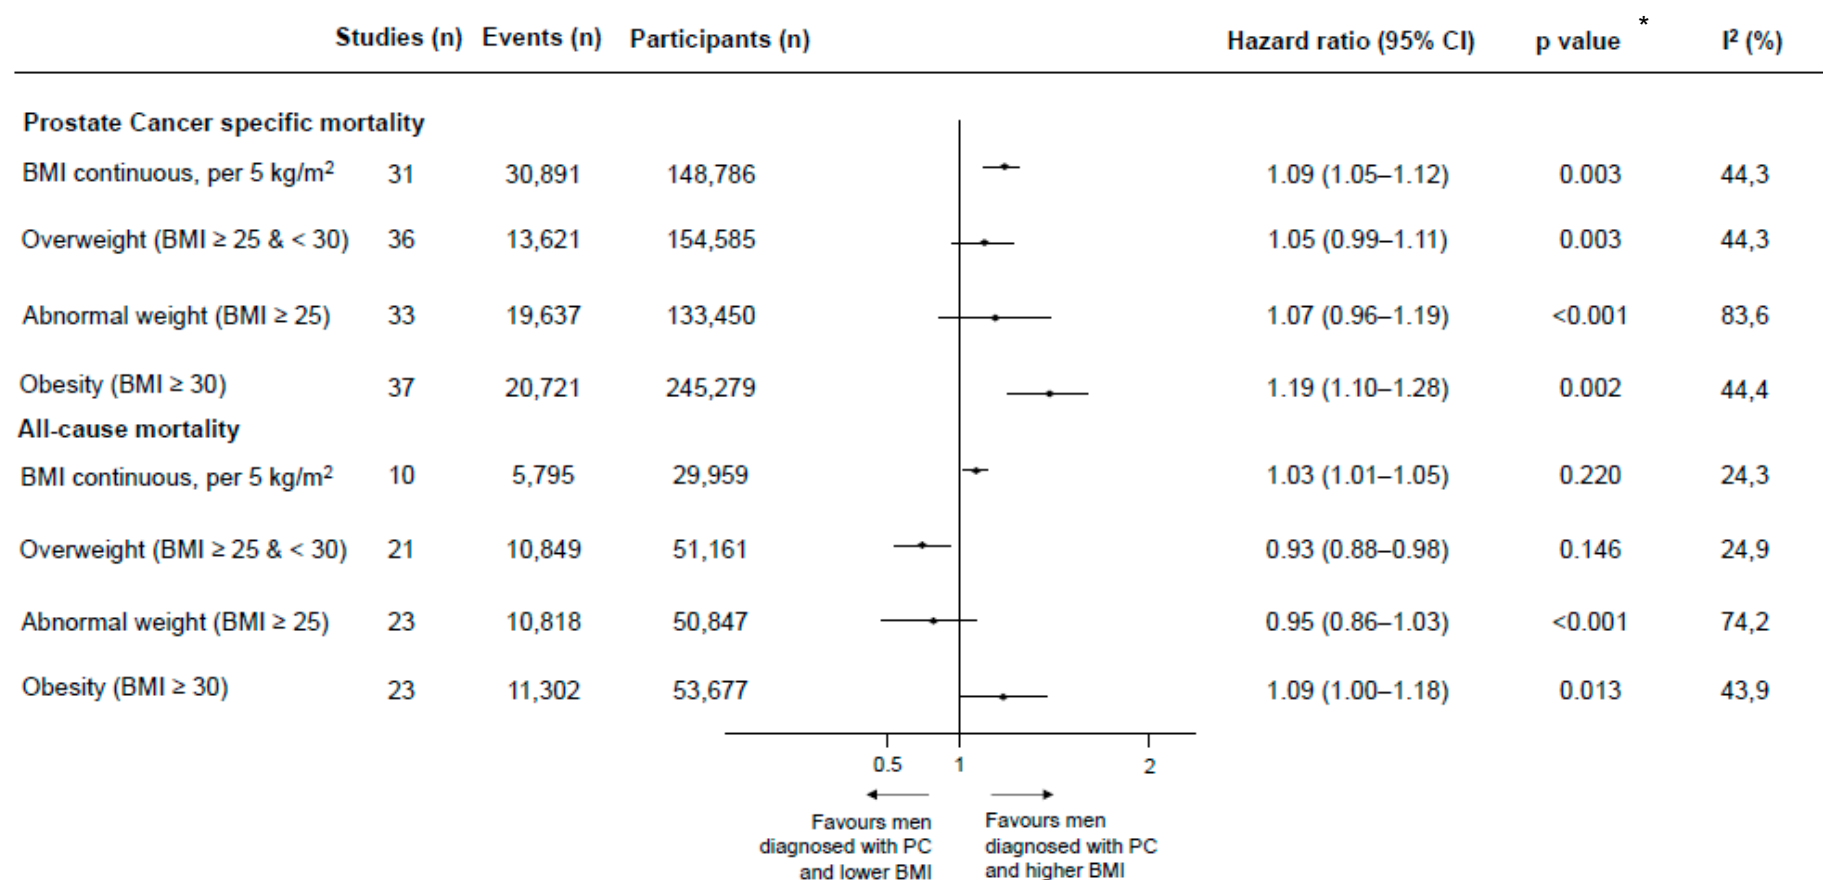

\* *P-values of the heterogeneity test.*
