# Supplementary material for: Obesity as a Risk Factor for Prostate Cancer Mortality: A Systematic Review and Dose-Response Meta-Analysis of 280,199 Patients
Source: MDPI journal article supplement (doi:10.3390/cancers13164169), 2021-08-19

Funnel plots of the pooled associations between obesity (BMI  $\geq 30$ ) and continuous BMI per 5 kg/m<sup>2</sup> with prostate cancer specific mortality and all-cause mortality.

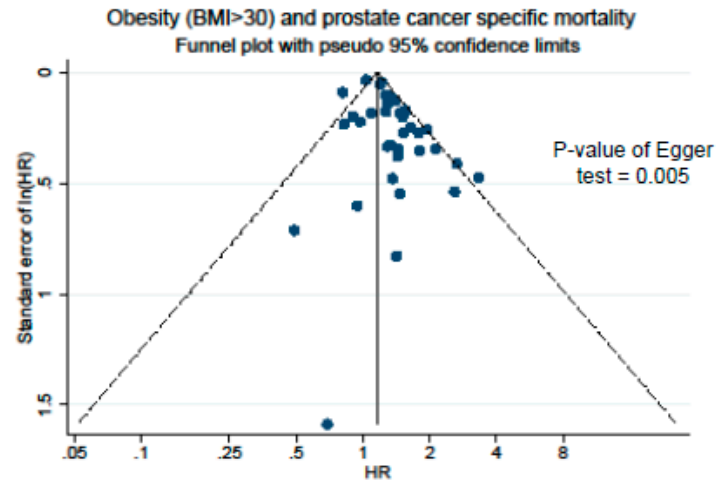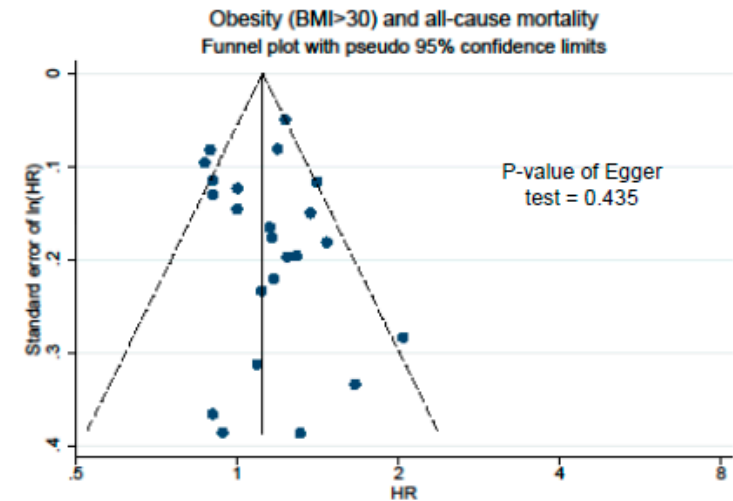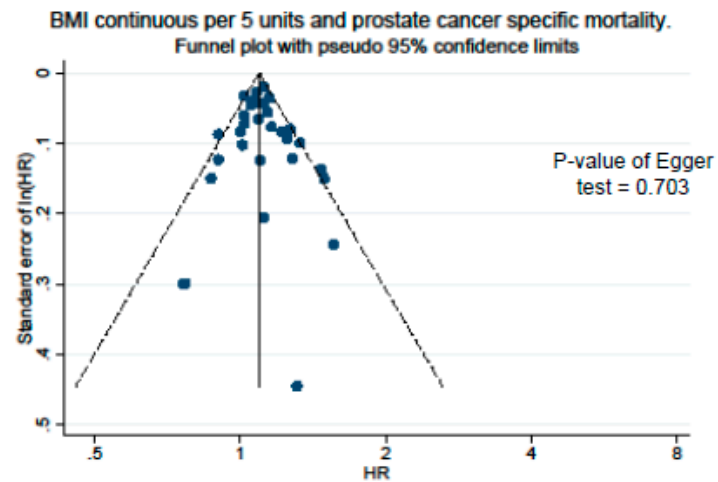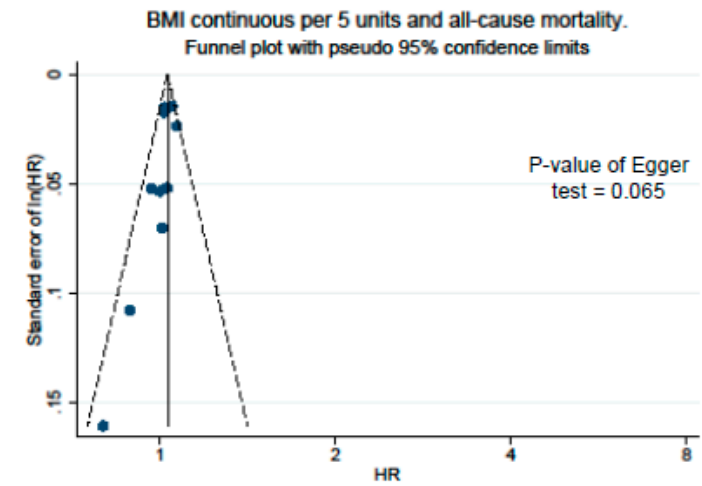

Supplement: s1 [file s1]
