# Supplementary material for: Obesity as a Risk Factor for Prostate Cancer Mortality: A Systematic Review and Dose-Response Meta-Analysis of 280,199 Patients
Source: MDPI journal article supplement (doi:10.3390/cancers13164169), 2021-08-19
Supplement: s1 [file s1]

Main characteristics of the studies included in the systematic review of prognosis of prostate cancer with respect to obesity.

| Author     | Year | Country | Follow-up                    | Design                | Participants and population                   | Exposure          | Outcome    | Adjustment variables                                                                                                                                                                                                                                                 | NOS |
|------------|------|---------|------------------------------|-----------------------|-----------------------------------------------|-------------------|------------|----------------------------------------------------------------------------------------------------------------------------------------------------------------------------------------------------------------------------------------------------------------------|-----|
| Bluethmann | 2020 | USA     | 2004-2014                    | cohort, prospective   | 90,694 PC survivors of >40 years              | BMI postdiagnosis | PCSM       | age, race/ethnicity, insurance status, rurality, lymph node status, PC aggressiveness, serum PSA, smoking, physical inactivity, chronic drinking, and fruit/vegetable intake                                                                                         | 6   |
| Crump      | 2020 | Sweden  | 1972-2017, mean 39.5 years   | cohort, prospective   | 699,125 participants. 10,782 incident PC      | BMI prediagnosis  | PCSM       | age, year of military conscription examination, CRF, muscle strength, country of birth, education, neighbourhood SES, FHPC                                                                                                                                           | 9   |
| Jochems    | 2020 | Sweden  | 1971-2016, mean 28 years     | cohort, prospective   | 431,902 participants. 38,871 incident PC      | BMI prediagnosis  | PCSM       | age at study entry, smoking status, healthcare region, country of birth and education, income closest to diagnosis, source of income closest to diagnosis, civil status closest to diagnosis, Charlson comorbidity index, primary treatment for PC, PC risk category | 8   |
| Vidal      | 2020 | USA     | 1990-2019, median 7.4 years  | cohort, retrospective | 5,929 PC patients who underwent RP            | BMI postdiagnosis | PCSM       | age, race, surgical center, year of surgery, PSA, biopsy grade group, pathologic grade group (not biopsy), positive surgical margins, seminal vesicle invasion, extracapsular invasion, and lymph node involvement                                                   | 7   |
| Jackson    | 2020 | Jamaica | 2005-2017, median 11.3 years | cohort, retrospective | 242 incident PC in African-Caribbean ancestry | BMI postdiagnosis | PCSM, A-CM | age, smoking, diabetes, Gleason score, primary treatment modality, FHPC and androgen deprivation therapy                                                                                                                                                             | 6   |
| Troeschel  | 2020 | USA     | 1992-2016, median 5.7 years  | cohort, prospective   | 11,788 participants. 8,330 non-metastatic PC  | BMI postdiagnosis | PCSM, A-CM | age, education, smoking, PSA, T, Gleason, initial treatment, year of diagnosis                                                                                                                                                                                       | 6   |
| Dickerman  | 2019 | Iceland | 2002-2015, median 10.1 years | cohort, prospective   | 5,764 participants. 172 incident PC           | BMI postdiagnosis | PCSM       | age, family FHPC, smoking status, education, frequency of moderate/ vigorous physical activity during youth and midlife, presence of a physician visit over the past year                                                                                            | 8   |
| Langlais   | 2019 | USA     | 1995-2018, median 4.5 years  | cohort, prospective   | 3,230 PC patients who underwent RP            | BMI postdiagnosis | A-CM       | age, race, smoking status, comorbidities, surgical approach, PSA, pathologic Gleason                                                                                                                                                                                 | 6   |

|               |      |           |                               |                       |                                                                          |                   |            |                                                                                                                                                                                                                                                                                                      |   |
|---------------|------|-----------|-------------------------------|-----------------------|--------------------------------------------------------------------------|-------------------|------------|------------------------------------------------------------------------------------------------------------------------------------------------------------------------------------------------------------------------------------------------------------------------------------------------------|---|
|               |      |           |                               |                       |                                                                          |                   |            | score, pathologic T-stage pathologic N-stage, and clinical stage                                                                                                                                                                                                                                     |   |
| Darcey        | 2019 | Australia | 2001-2017, median 15 years    | cohort, retrospective | 572 incident PC                                                          | BMI postdiagnosis | PCSM, A-CM | age, Gleason score                                                                                                                                                                                                                                                                                   | 7 |
| Wade          | 2019 | Sweden    | 1961-2004                     | cohort, prospective   | 996,898 participants, 12,712 incident PC                                 | BMI prediagnosis  | PCSM       | educational and occupation socioeconomical index                                                                                                                                                                                                                                                     | 8 |
| Farris        | 2018 | Canada    | 1997-2017                     | cohort, prospective   | 829 incident PC                                                          | BMI postdiagnosis | PCSM, A-CM | age at diagnosis, stage, prostatectomy, initial hormone therapy treatment, initial radiation therapy treatment, PSA levels at diagnosis, and post-diagnosis Charlson comorbidity index score                                                                                                         | 7 |
| Hu            | 2018 | China     | 2003-2015, median 49 months   | cohort, retrospective | 435 PC patients receiving androgen deprivation therapy                   | BMI postdiagnosis | A-CM       | age, diabetes, Japan Cancer of the Prostate Risk Assessment (J-CAPRA) score                                                                                                                                                                                                                          | 6 |
| Pérez-Cornago | 2017 | Europe    | 1992-2013, average 13.9 years | cohort, prospective   | 141,896 participants, 7,024 incident PC                                  | BMI postdiagnosis | PCSM       | age, center, education level, smoking status, marital status, Diabetes, physical activity                                                                                                                                                                                                            | 9 |
| Dickerman     | 2017 | USA       | 1986-2012,                    | cohort, prospective   | 5,158 patients with clinically localized PC                              | BMI postdiagnosis | PCSM       | age at diagnosis, race, FHPC, smoking status at diagnosis, diabetes at diagnosis, heart/lung disease by time of diagnosis, physical activity, energy intake, tomato sauce intake, coffee intake, alpha-linolenic acid and calcium intake, clinical stage, grade, PSA at diagnosis, primary treatment | 7 |
| Kelly         | 2017 | USA       | 1993-2009, median 11.5 years  | cohort, prospective   | 7,822 incident PC                                                        | BMI prediagnosis  | PCSM       | screening arm, family history of prostate cancer, race, study center, education, marital status, cigarette smoking status, diabetes, myocardial infarction, PSA history during the three years prior to enrolment                                                                                    | 8 |
| Polesel       | 2016 | Italy     | 1995-2002, median 11.6 years  | cohort, retrospective | 715 incident PC                                                          | BMI prediagnosis  | PCSM, A-CM | age, area of residence, calendar period, years of education, Gleason score, smoking habits                                                                                                                                                                                                           | 7 |
| Cushen        | 2016 | Ireland   | 2008-2014                     | cohort, retrospective | 63 patients with metastatic castrate-resistant PC treated with docetaxel | BMI postdiagnosis | A-CM       | age, bone metastases and non-osseous metastases, anaemia, muscle density, sarcopenia, visceral fat (VAT) index and subcutaneous fat (SAT) index                                                                                                                                                      | 5 |

|            |      |                 |                               |                                |                                                           |                   |            |                                                                                                                                                                                       |   |
|------------|------|-----------------|-------------------------------|--------------------------------|-----------------------------------------------------------|-------------------|------------|---------------------------------------------------------------------------------------------------------------------------------------------------------------------------------------|---|
| Fowke      | 2015 | Asian countries | 1963-2006, mean 9 years       | 18 cohort, prospective studies | 522,736 participants, 634 PC deaths                       | BMI prediagnosis  | PCSM       | age, education, population density, marital status, history of severe cancer, heart disease, or stroke at baseline                                                                    | 7 |
| Wang       | 2015 | USA             | 2001-2010, median 47.6 months | cohort, retrospective          | 1,442 localized PC after receiving intensity-modulated RT | BMI postdiagnosis | PCSM, A-CM | age, androgen deprivation therapy (ADT), pretreatment PSA as a log-transformed variable (iPSA), Gleason score and T classification                                                    | 8 |
| Cantarutti | 2015 | Sweden          | 2001-2012                     | cohort, retrospective          | 3,161 incident PC                                         | BMI prediagnosis  | PCSM, A-CM | age at inclusion to study, PSA, treatment                                                                                                                                             | 7 |
| Taghizadeh | 2015 | The Netherlands | 1965-2008, median 34.5 years  | cohort, prospective            | 3,718 incident PC                                         | BMI prediagnosis  | PCSM       | age, smoking and place of residence                                                                                                                                                   | 7 |
| Mohammed   | 2015 | Saudi Arabia    | 2011-2015, median 14.4 months | cohort, retrospective          | 71 metastatic PC                                          | BMI postdiagnosis | PCSM       | age, PSA, alkaline phosphatase, visceral metastasis, bone, lactate dehydrogenase, albumin and poorly differentiated pathology                                                         | 7 |
| Moller     | 2015 | Denmark         | 1993-2011, median 15.5 years  | cohort, prospective            | 26,877 participants, 1,813 incident PC                    | BMI prediagnosis  | PCSM       | stage (TNM)                                                                                                                                                                           | 7 |
| Bonn       | 2014 | Sweden          | 1997-2007, median 4 years     | cohort, retrospective          | 4,367 clinically localized PC                             | BMI postdiagnosis | PCSM, A-CM | age at diagnosis, primary treatment, Gleason score at diagnosis, PSA level, T-, N- and M-stages at diagnosis, smoking habits, and total metabolic equivalent time (MET-h) at age 50   | 6 |
| Chalfin    | 2014 | USA             | 1982-2012, median 5 years     | cohort, retrospective          | 11,152 PC patients who underwent RP                       | BMI postdiagnosis | PCSM, A-CM | age, year of surgery, race, preoperative PSA, pathology stage, pathologic Gleason sum, and positive surgical margin                                                                   | 6 |
| Haque      | 2014 | USA             | 1971-2001                     | case-control, retrospective    | 751 PC patients who underwent RP                          | BMI postdiagnosis | PCSM       | age at diagnosis, health plan site, race, year of diagnosis, stage at diagnosis, duration of health plan membership, PSA at diagnosis, surgical margins status, and lymph node status | 8 |
| Froehner   | 2014 | Germany         | 1992-2005, median 8.6 years   | cohort, retrospective          | 2,131 PC patients who underwent RP                        | BMI postdiagnosis | A-CM       | age, Gleason score, tumor stage, Charlson score and American Society of Anesthesiologists physical status class                                                                       | 8 |
| Gravis     | 2014 | France, Belgium | 2004-2008, median 58.4 months | cohort, prospective            | 385 non-castrate metastatic PC                            | BMI postdiagnosis | A-CM       | univariate                                                                                                                                                                            | 4 |

|                 |      |                               |                                        |                                       |                                                      |                      |               |                                                                                                                                                                                                                           |   |
|-----------------|------|-------------------------------|----------------------------------------|---------------------------------------|------------------------------------------------------|----------------------|---------------|---------------------------------------------------------------------------------------------------------------------------------------------------------------------------------------------------------------------------|---|
| Tendulkar       | 2013 | USA                           | 1996-2009,<br>median 74<br>months      | cohort,<br>retrospective              | 660 high-risk PC<br>treated with RT<br>and AD        | BMI<br>postdiagnosis | PCSM          | univariate                                                                                                                                                                                                                | 3 |
| Bassett         | 2012 | Australia                     | 1990-2009,<br>mean 15<br>years         | cohort,<br>prospective                | 16,514<br>participants, 1,374<br>incident PC         | BMI<br>prediagnosis  | PCSM          | country of birth and education                                                                                                                                                                                            | 8 |
| Schwartz        | 2012 | USA                           | 1988-2006                              | cohort,<br>prospective                | 6,707 participants,<br>49 PC deaths                  | BMI<br>prediagnosis  | PCSM          | age, ionized calcium, serum albumin and 25-<br>OH vitaminD                                                                                                                                                                | 8 |
| Park            | 2012 | Korea                         | 2003-2009,<br>median<br>24.6<br>months | cohort,<br>retrospective              | 55 castration-<br>resistant PC                       | BMI<br>postdiagnosis | PCSM          | age, Gleason score, log PSA, hemoglobin,<br>Eastern Cooperative Oncology Group<br>Performance Status, alkaline phosphatase,<br>visceral metastasis, prior retropubic radical<br>prostatectomy and prior radiation therapy | 7 |
| Haggstrom       | 2012 | Norway,<br>Sweden,<br>Austria | 1972-2006,<br>mean 12<br>years         | cohort,<br>prospective<br>(7 cohorts) | 289,866<br>participant, 6,673<br>incident PC         | BMI<br>prediagnosis  | PCSM          | smoking, five birth cohorts and five<br>categories of age at measurement                                                                                                                                                  | 8 |
| Disciaciatti    | 2011 | Sweden                        | 1998-2007                              | cohort,<br>prospective                | 36,959<br>participants, 2,084<br>incident PC         | BMI<br>prediagnosis  | PCSM          | age at baseline, BMI at age 30 years, total<br>energy intake, total physical activity, years of<br>education, smoking status, family history of<br>prostate cancer and, personal history of<br>diabetes                   | 7 |
| Dehal           | 2011 | USA                           | 1971-1992,<br>average 17<br>years      | cohort,<br>prospective                | 7,016 participant,<br>3,127 incident PC              | BMI<br>prediagnosis  | PCSM          | age, socio-economic status variables,<br>cigarette smoking, alcohol drinking and<br>dietary pattern                                                                                                                       | 9 |
| Geinitz         | 2011 | Germany                       | 1994-2002,<br>median 51<br>months      | cohort,<br>retrospective              | 564 localized PC<br>after conformal RT               | BMI<br>postdiagnosis | PCSM,<br>A-CM | age, PSA, and radiation dose, endocrine<br>treatment, T stage, and histological grade                                                                                                                                     | 7 |
| Van<br>Roermund | 2010 | The<br>Netherlands            | 1991-2008,<br>median 47<br>months      | cohort,<br>retrospective              | 1,530 localized PC<br>who underwent<br>brachytherapy | BMI<br>postdiagnosis | PCSM,<br>A-CM | age, preoperative PSA, pathological stage,<br>pathological grade, risk group, prostate<br>volume, preoperative pelvic lymph node<br>dissection, treatment period and number of<br>seeds                                   | 7 |
| Han             | 2010 | USA                           | 1983-2000,<br>median 13<br>years       | cohort,<br>retrospective              | 2,718 PC patients<br>who underwent RP                | BMI<br>postdiagnosis | A-CM          | univariate                                                                                                                                                                                                                | 7 |
| Burton          | 2010 | UK                            | 1948-2009,<br>median 49<br>years       | cohort,<br>prospective                | 9,549 participants,<br>211 incident PC               | BMI<br>prediagnosis  | PCSM          | smoking, father's social class and height                                                                                                                                                                                 | 7 |

|                   |      |                     |                              |                                |                                                |                   |            |                                                                                                                                                                                                                               |   |
|-------------------|------|---------------------|------------------------------|--------------------------------|------------------------------------------------|-------------------|------------|-------------------------------------------------------------------------------------------------------------------------------------------------------------------------------------------------------------------------------|---|
| Martin            | 2009 | Norway              | 1995-2005, median 9.3 years  | cohort, prospective            | 29,364 participants, 687 incident PC           | BMI prediagnosis  | PCSM       | age, height, smoking, marital status, education, physical activity, International Prostate Symptom Score                                                                                                                      | 8 |
| Pfitzenmaier      | 2009 | Germany             | median 5.5 years             | cohort, prospective            | 620 PC patients who underwent RP               | BMI postdiagnosis | A-CM       | tumor extension, lymph node, tumor grading, PSA and resection margin                                                                                                                                                          | 4 |
| Davies            | 2009 | USA                 | 1995-2007, mean 51.3 months  | cohort, prospective            | 7,274 clinically localized PC                  | BMI postdiagnosis | PCSM, A-CM | age, clinical risk, presence of diabetes and type of therapy                                                                                                                                                                  | 6 |
| Armstrong         | 2009 | USA                 | 2000-2006                    | cohort, prospective            | 1,001 castration-resistant metastatic PC       | BMI postdiagnosis | A-CM       | baseline pain, presence of liver metastases, performance status, hemoglobin, alkaline phosphatase, PSA, PSA doubling time, number of sites of metastatic disease, type of progression, high-grade disease and treatment group | 5 |
| Ma                | 2008 | USA                 | 1982-2007, median 7 years    | cohort, prospective            | 2,546 incident PC                              | BMI prediagnosis  | A-CM       | age at diagnosis, baseline smoking status, time interval from BMI measurement to PC diagnosis, clinical stage and Gleason grade                                                                                               | 7 |
| Merrick           | 2007 | USA                 | 1995-2003, mean 5.9 years    | cohort, prospective            | 1,093 localized PC who underwent brachytherapy | BMI prediagnosis  | PCSM, A-CM | univariate                                                                                                                                                                                                                    | 5 |
| Efstathiou        | 2007 | USA                 | 1987-2005, median 8.1 years  | cohort, prospective            | 945 locally advanced PC                        | BMI postdiagnosis | PCSM, A-CM | age, race, treatment arm, history of prostatectomy, nodal involvement, Gleason score and clinical stage                                                                                                                       | 6 |
| Gong              | 2007 | USA                 | 1993-2004, average 9.5 years | cohort, prospective            | 752 incident PC                                | BMI prediagnosis  | PCSM, A-CM | age at diagnosis, race, smoking status, Gleason score, stage at diagnosis and primary treatment                                                                                                                               | 8 |
| Montgomery (8894) | 2007 | USA                 | 1989-1994                    | cohort, prospective            | 1,006 metastatic PC treated with AD            | BMI postdiagnosis | A-CM       | treatment arm, race, pre-study Gleason sum, pre-study bone pain, disease extent, performance status and pre-study PSA                                                                                                         | 5 |
| Montgomery (9916) | 2007 | USA                 | 1999-2003                    | cohort, prospective            | 671 metastatic PC treated with chemotherapy    | BMI postdiagnosis | A-CM       | treatment arm, race, pre-study Gleason sum, pre-study bone pain, disease extent, performance status and pre-study PSA                                                                                                         | 5 |
| Wright            | 2007 | USA                 | 1995-2001                    | cohort, prospective            | 287,760 participants, 9,986 incident PC        | BMI prediagnosis  | PCSM       | age, race, smoking status, education, personal history of diabetes, FHPC                                                                                                                                                      | 6 |
| Huxley            | 2007 | Asia-Pacific region | median 6.8 years             | cohort prospective, 24 cohorts | 320,852 participants, 308 PC deaths            | BMI prediagnosis  | PCSM       | smoking and diabetes                                                                                                                                                                                                          | 6 |
| Halabi            | 2007 | USA                 | 1991-2004, median            | cohort, retrospective          | 1,226 castration-recurrent PC                  | BMI postdiagnosis | PCSM, A-CM | age race, ECOG performance status, Gleason score, hemoglobin, testosterone,                                                                                                                                                   | 6 |

|                    |      |             |                              |                       |                                         |                   |            |                                                                                                                                                       |   |
|--------------------|------|-------------|------------------------------|-----------------------|-----------------------------------------|-------------------|------------|-------------------------------------------------------------------------------------------------------------------------------------------------------|---|
|                    |      |             | 33.8 months                  |                       |                                         |                   |            | PSA, alkaline phosphatase, LDH, presence of visceral disease, prior treatment with radiotherapy, years since diagnosis                                |   |
| Siddiqui           | 2006 | USA         | 1990-1999, median 10.1 years | cohort, prospective   | 5,313 PC patients who underwent RP      | BMI postdiagnosis | PCSM, A-CM | Gleason score, preoperative serum PSA, surgical margin status, seminal vesicle invasion and adjuvant treatment                                        | 6 |
| Park               | 2006 | Korea       | 1996-2004, median 3.86 years | cohort, prospective   | 14,578 participants, 256 incident PC    | BMI prediagnosis  | A-CM       | age, alcohol consumption, fasting serum glucose level, cholesterol level, physical activity, food preference, blood pressure, and other comorbidities | 7 |
| Eichholzer         | 2005 | Switzerland | 1971-1990                    | cohort, prospective   | 2,974 participants, 30 PC deaths        | BMI prediagnosis  | PCSM       | age and smoking                                                                                                                                       | 6 |
| Rodriguez (CPS-I)  | 2001 | USA         | 1959-1972                    | cohort, prospective   | 456,490 participants, 2,277 PC deaths   | BMI prediagnosis  | PCSM       | age at interview, race, height, education, exercise, smoking status and FHPC                                                                          | 7 |
| Rodriguez (CPS-II) | 2001 | USA         | 1982-1996                    | cohort, prospective   | 508,351 participants, 5,414 PC deaths   | BMI prediagnosis  | PCSM       | age at interview, race, height, education, exercise, smoking status and FHPC                                                                          | 7 |
| Gapstur            | 2001 | USA         | 1967-1997, mean 27 years     | cohort, prospective   | 20,433 participant, 176 PC deaths       | BMI prediagnosis  | PCSM       | age, postload plasma glucose level, heart rate, education and race                                                                                    | 7 |
| Andersson          | 1997 | Sweden      | 1971-1991, average 18 years  | cohort, retrospective | 135,006 participants, 2,368 incident PC | BMI prediagnosis  | PCSM       | age                                                                                                                                                   | 7 |
