# Supplementary material for: Obesity as a Risk Factor for Prostate Cancer Mortality: A Systematic Review and Dose-Response Meta-Analysis of 280,199 Patients
Source: MDPI journal article supplement (doi:10.3390/cancers13164169), 2021-08-19
Supplement: s1 [file s1]

Supporting methods.

*Search terms.*

1. prostat\* cancer.ti,ab
2. prostat\* neoplasm.ti,ab
3. prostat\* tumor.ti,ab
4. mortality.ti,ab
5. death.ti,ab
6. prognos\*.ti,ab
7. survival.ti,ab
8. outcome\*.ti,ab
9. obes\*.ti,ab
10. body mass index.ti,ab
11. BMI.ti,ab
12. weight.ti,ab
13. cohort.ti,ab
14. case-control.ti,ab
15. follow-up.ti,ab
16. 1 OR 2 OR 3
17. 4 OR 5 OR 6 OR 7 OR 8
18. 9 OR 10 OR 11 OR 12
19. 13 OR 14 OR 15
20. 16 AND 17 AND 18 AND 19
